# Supplementary material
Source: publisher figshare collection journal article supplement (https://acs.figshare.com/ndownloader/files/12846434)
Supplement: Supplementary file 1 [file 12846434]

# Supporting Information

Thermally Stimulated Light Reflection and Photoluminescence of BaTiO<sub>3</sub>

*Takumi Watanabe, Daiki Hoshi, Masaya Ishida, and Tomonori Ohba\**

Graduate School of Science, Chiba University, 1-33 Yayoi, Inage, Chiba 263-8522,  
Japan

\*E-mail: ohba@chiba-u.jp

Figures S1–S6

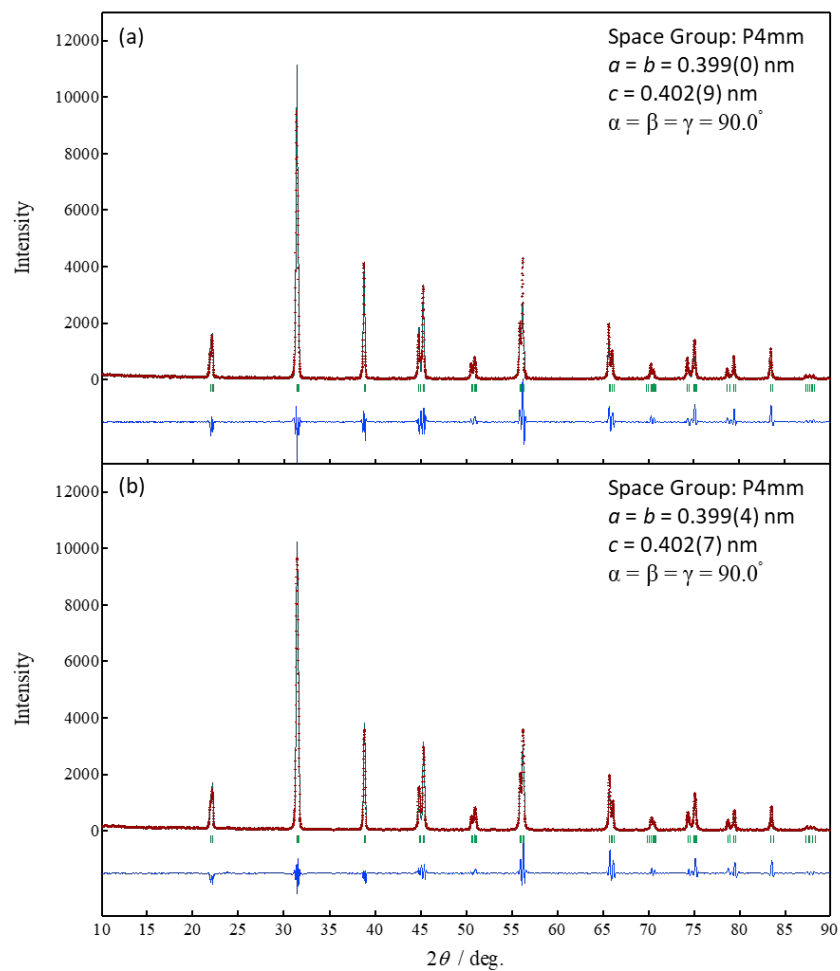

**Figure S1.** Reitveld analysis of BaTiO<sub>3</sub> crystals prepared in this study (a) and provided by Kojundo Chemical Laboratory (b).

Figure S2 shows the energy dispersive spectroscopy of  $\text{BaTiO}_3$  crystals we synthesized and prepared by Kojyundo Chemical Laboratory,  $\text{TiO}_2$  and  $\text{BaCO}_3$  as reagents. The energy dispersive spectroscopic curves of both  $\text{BaTiO}_3$  crystals only had the peaks attributed to Ba, Ti, and O atoms, and perfectly coincided with each other. The energy dispersive spectroscopic peaks of  $\text{TiO}_2$  and  $\text{BaCO}_3$  reagents were attributed to Ti and O atoms, and Ba and O atoms, respectively. The major peaks by Ba and Ti atoms were close to each other and hard to be distinguished. This strongly affected the elemental analysis, as shown below. The atomic ratios were Ba:Ti:O = 14:8:78 for the synthesized  $\text{BaTiO}_3$  crystals and Ba:Ti:O = 14:9:77 for the referenced  $\text{BaTiO}_3$  crystals, although the equivalent atomic ratio of Ba, Ti, and O is 20:20:60.

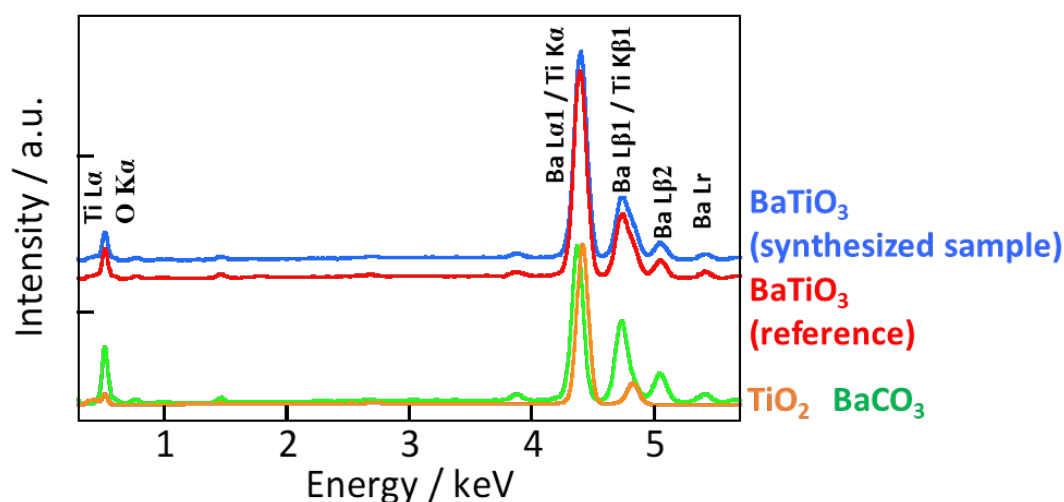

Figure S2. Energy dispersive spectroscopy of  $\text{BaTiO}_3$  crystals prepared in this study, provided by Kojundo Chemical Laboratory,  $\text{TiO}_2$ , and  $\text{BaCO}_3$  as reagents for  $\text{BaTiO}_3$  synthesis.

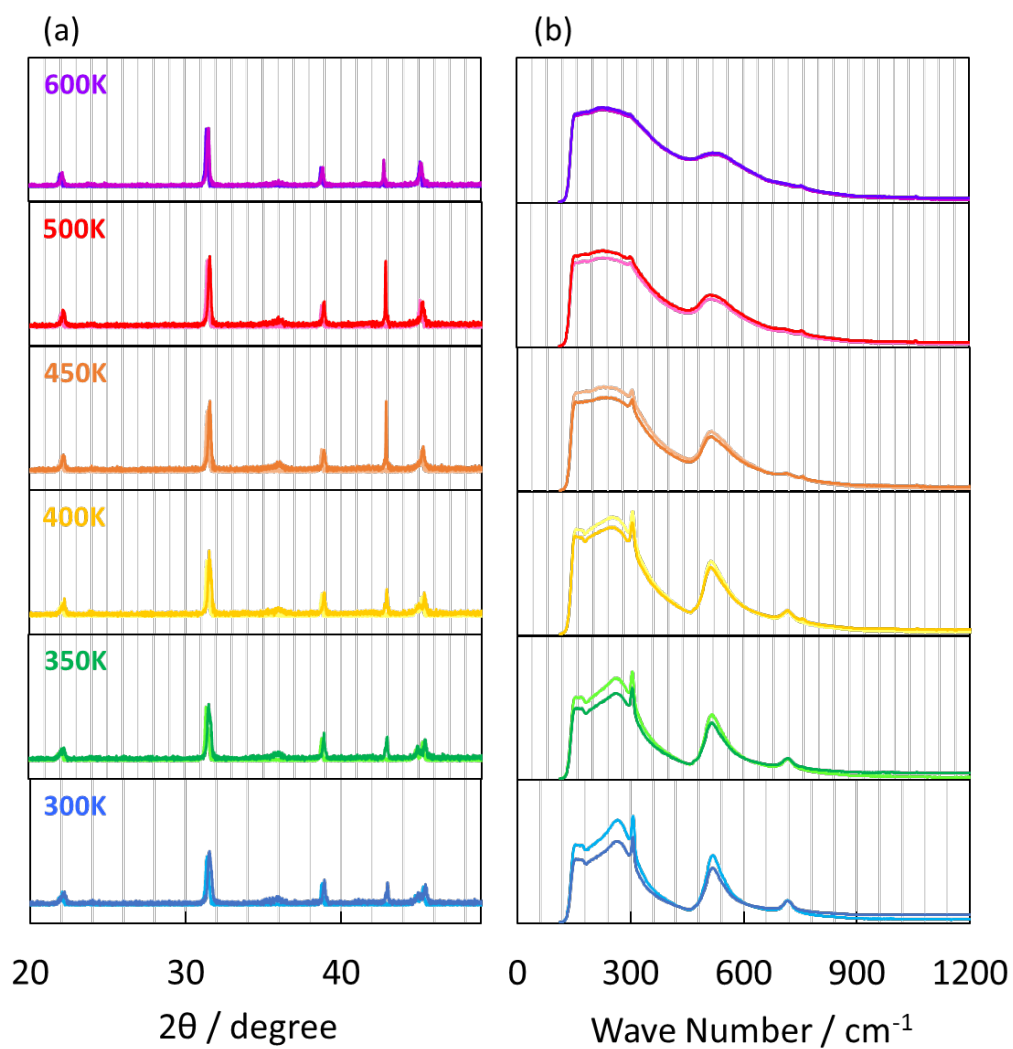

**Figure S3.** XRD patterns (a) and Raman spectra (b) of BaTiO<sub>3</sub> (b) at 300–600 K. Dark and light curves represent heating and cooling processes, respectively.

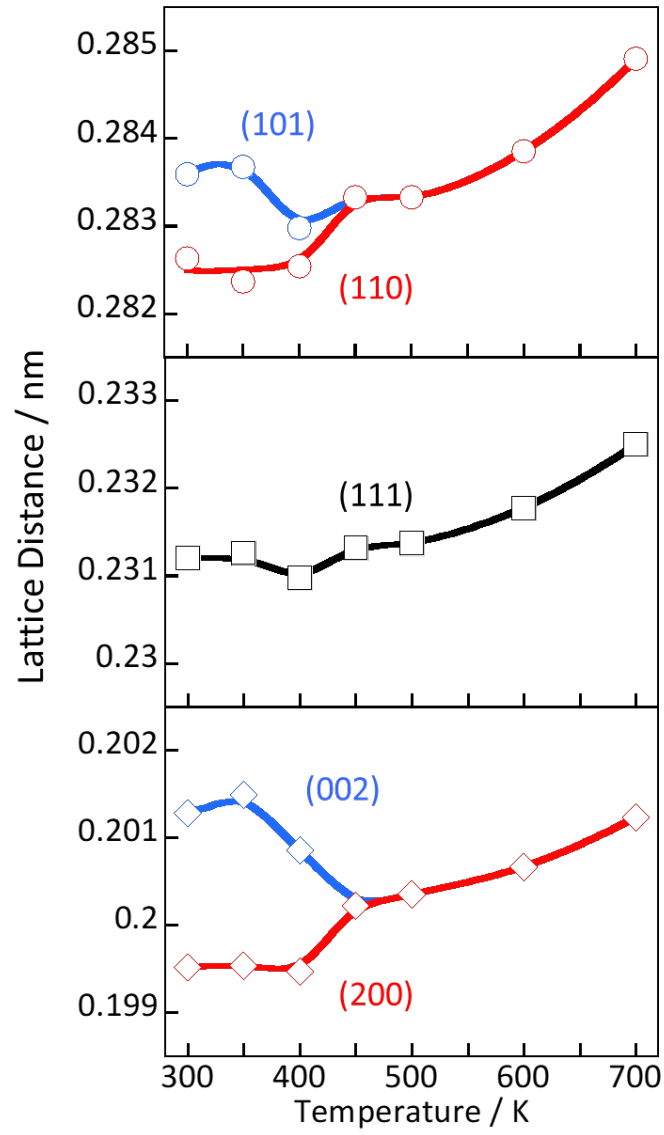

**Figure S4.** Temperature-dependence of lattice size of BaTiO<sub>3</sub> crystals for (101)/(110), (111), and (002)/(200) faces.

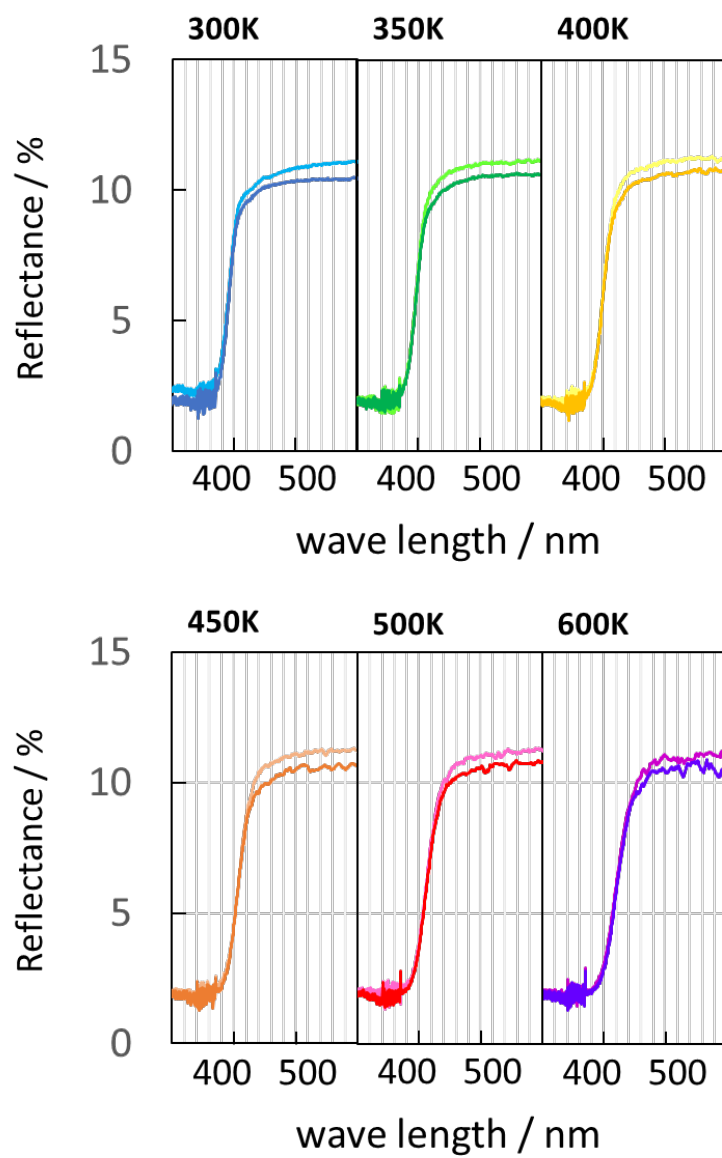

**Figure S5.** Reflectance spectra of BaTiO<sub>3</sub> at 300–600 K. Dark and light curves represent heating and cooling processes, respectively.

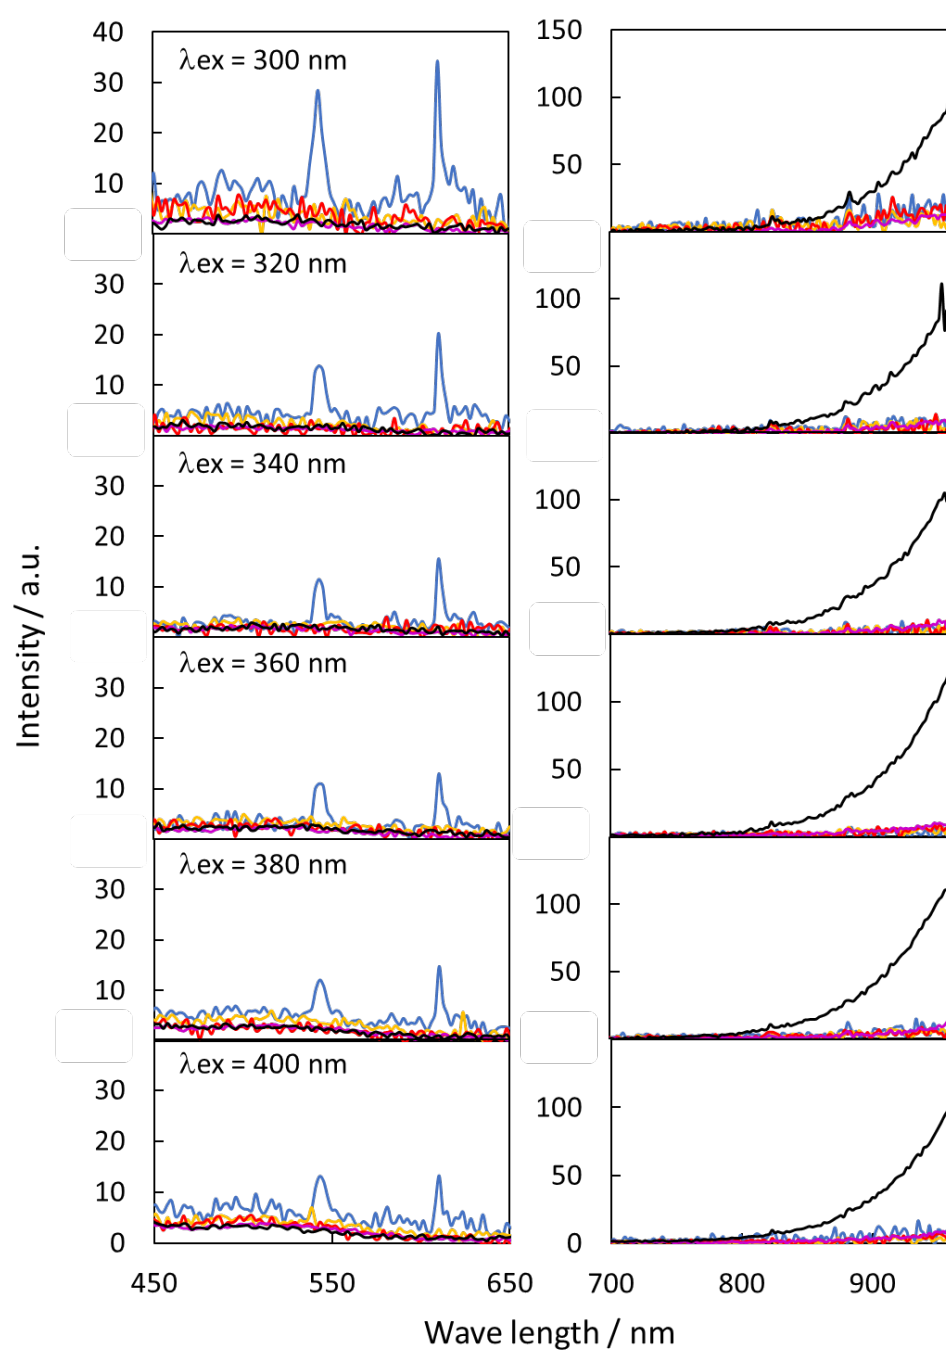

**Figure S6.** Photoluminescence spectra of BaTiO<sub>3</sub> at 300 (blue), 400, (yellow), 500 (red), 600 (purple), and 700 K (black) at excitation wavelengths of 300–400 nm.
